# Supplementary material for: Study of Physico-Chemical Changes of CdTe QDs after Their Exposure to Environmental Conditions
Source: MDPI journal article supplement (doi:10.3390/nano10050865), 2020-04-30
Supplement: s1 [file s1]

## Supplement

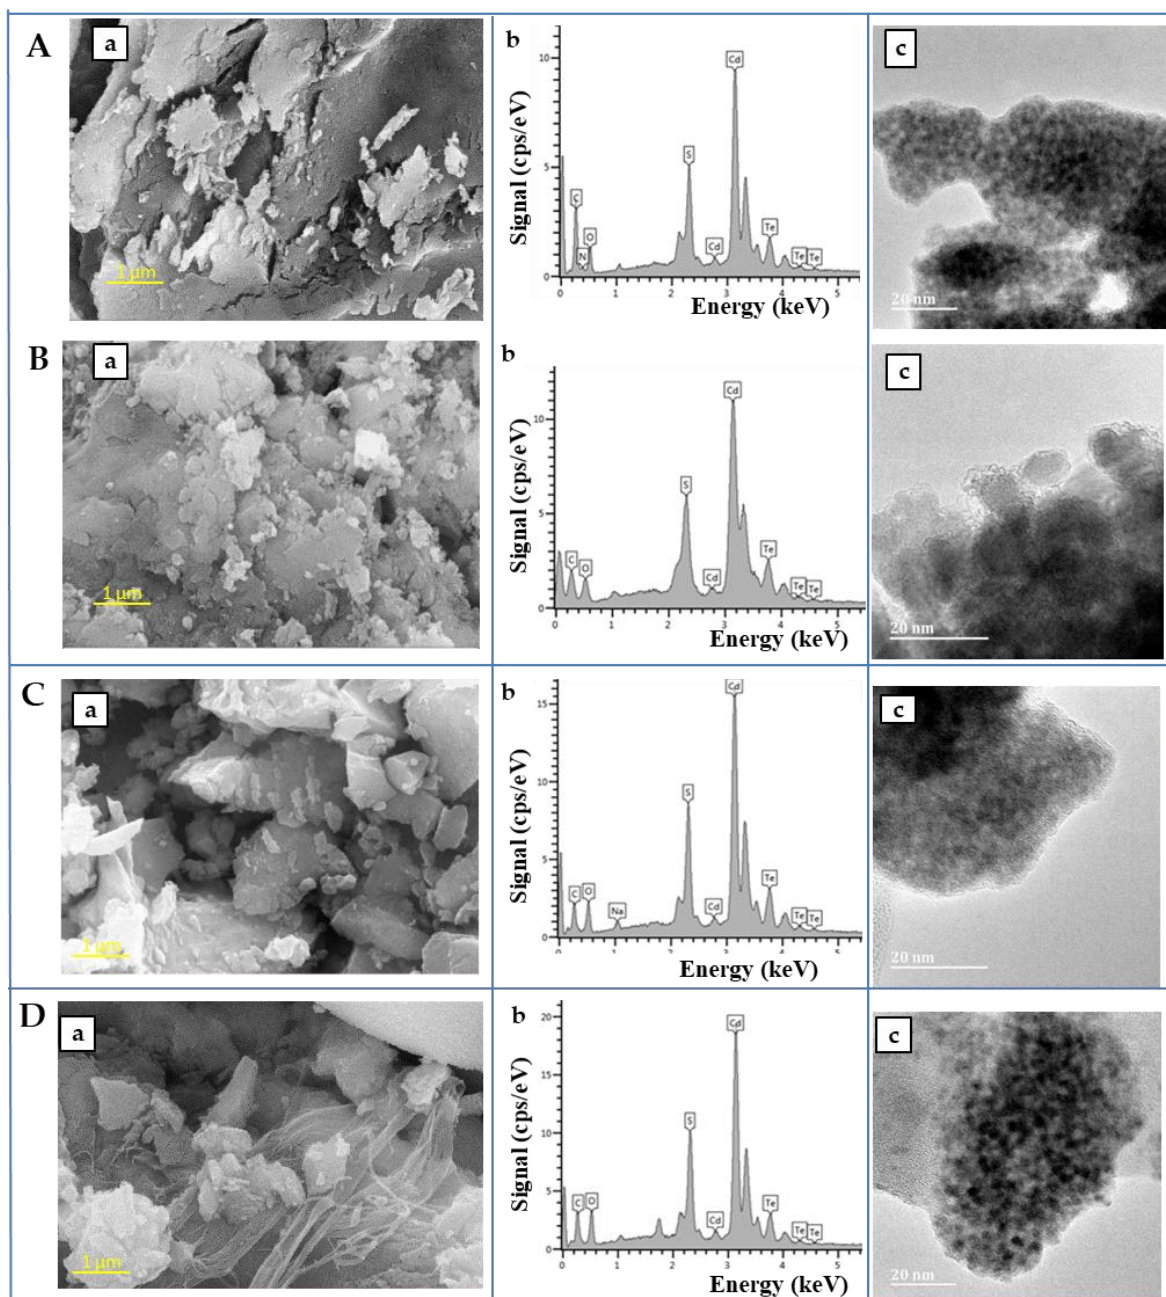

**Figure S1.** SEM (a), EDX elemental mapping (b) and HRTEM (c) of CdTe quantum dots (QDs). (A) Yellow, (B) green, (C) red and (D) orange CdTe QDs. Further experimental details are described in the Materials and Methods section.
